# Supplementary material for: The Batten Disease Palmitoyl Protein Thioesterase 1 Gene Regulates Neural Specification and Axon Connectivity during Drosophila Embryonic Development
Source: PubMed Central journal article supplement (PMC3008717; doi:10.1371/journal.pone.0014402), 2010-12-22

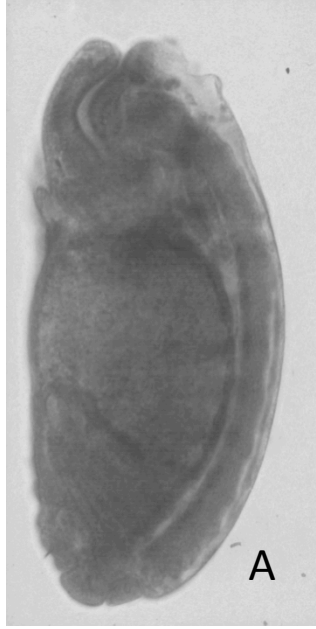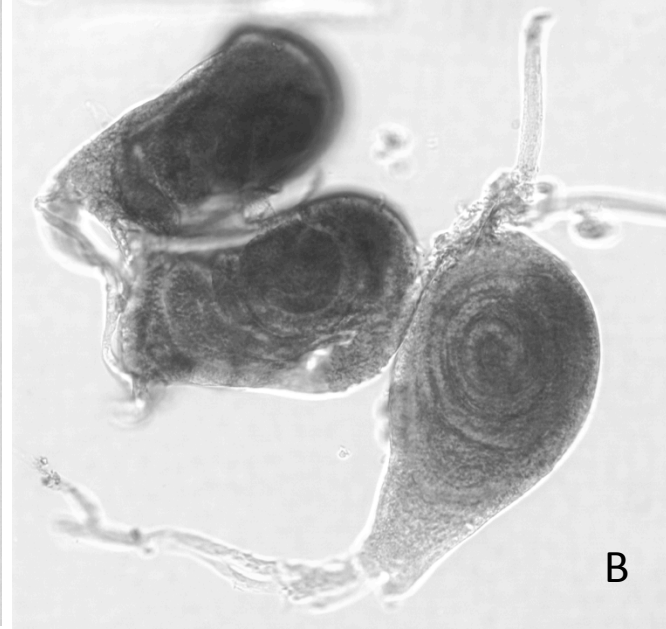

Supplement: pone.0014402.s001.pdf [file pone.0014402.s001.pdf]
